# Supplementary material for: A novel flexible vacuum‐assisted ureteric access sheath in retrograde intrarenal surgery
Source: PubMed Central journal article supplement — BJU Int. 2022 Sep 6;130(5):586–8. doi: 10.1111/bju.15873 (PMC9826103; doi:10.1111/bju.15873), 2022-09-06
Supplement: BJU-130-586-s002.pdf [file BJU-130-586-s002.pdf]

**Table S1. Patient demographics and preoperative data**

|                                                   |                                   |
|---------------------------------------------------|-----------------------------------|
| Age (years), mean (SD), range                     | 50 (11.4), 26-73                  |
| Gender (n, male/female)                           | 29/24                             |
| BMI (kg/m <sup>2</sup> ), mean (SD), range        | 24.8 (2.8), 19.0-30.4             |
| Preoperative Double-J stent, n ( %)               | 6(11.3%)                          |
| Grade of Hydronephrosis <sup>a</sup> , n ( %)     |                                   |
| I                                                 | 39 (73.6%)                        |
| II                                                | 11(20.7%)                         |
| III                                               | 3(5.7%)                           |
| IV                                                | 0                                 |
| V                                                 | 0                                 |
| Stone property                                    |                                   |
| Laterality (n, left/ right)                       | 29/24                             |
| Largest stone size (mm), mean (SD), range         | 17.1 (2.9), 11-25                 |
| Stone volume (mm <sup>3</sup> ), mean (SD), range | 2555.3 (1057.2), 955.6-<br>5748.8 |
| Highest stone density (HU), mean (SD), range      | 1330.6 (274.9), 892-1956          |
| Stone location, n ( %)                            |                                   |
| Upper ureter                                      | 0                                 |
| Renal pelvic                                      | 22 (41.5%)                        |
| Upper calix                                       | 2 (3.8%)                          |
| Middle calix                                      | 11 (20.7%)                        |
| Lower calix                                       | 5 (9.5%)                          |
| multiple calixs                                   | 13 (24.5%)                        |
| Positive urine culture, n ( %)                    | 8(15.1%)                          |

<sup>a</sup>: Grignon Grading system

**Table S2.** intraoperative and postoperative data

---

|                                                             |                         |
|-------------------------------------------------------------|-------------------------|
| Operation time (min), mean (SD), range                      | 70.8 (26.9), 36.0-154.0 |
| Not use basket, n ( %)                                      | 29(54.7%)               |
| Residual Stone                                              |                         |
| Largest residual stone (mm), mean (SD), range               | 1.0 (1.7), 0-6.0        |
| Residual stone volume (mm <sup>3</sup> ), mean (SD), range  | 85.1 (187.0), 0-1048.0  |
| Stone volume clearance rate <sup>b</sup> , mean (SD), range | 97.7 (4.4), 81.1-100.0  |
| Complete stone-free rate, n ( %)                            | 29 ( 69.8%)             |
| Residual Stone after 1 months, n ( %)                       | 6 (11.3%)               |
| Hemoglobin drop (g/dL), mean (SD), range                    | 0.5 (0.6), 0-3.2        |
| Complications, n ( %)                                       | 4(7.6%)                 |
| Fever                                                       | 2(3.8%)                 |
| Emesis                                                      | 2(3.8%)                 |
| Infection                                                   | 0                       |
| Transfusion                                                 | 0                       |
| Perforation                                                 | 0                       |
| Steinstrasse                                                | 0                       |

---

<sup>b</sup>: *Stone volume clearance rate* =  $\left(1 - \frac{\text{residual stone volume}}{\text{preoperative stone volume}}\right) \times 100\%$
